# Supplementary material
Source: Springer Nature journal article supplement (https://www.springermedizin.de/resource/supplementary/12936_2012_2491_MOESM12_ESM.pdf/9542830)

**A** Ring Stage synchronized culture after 48 ha

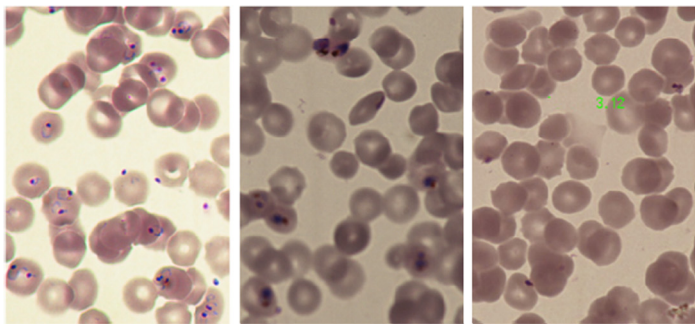

Untreated

$\Delta$ Fd 1.56  $\mu$ M (IC<sub>50</sub>)

3.12  $\mu$ M (IC<sub>80</sub>)

**B** Trophozoite stage synchronized culture after 24h

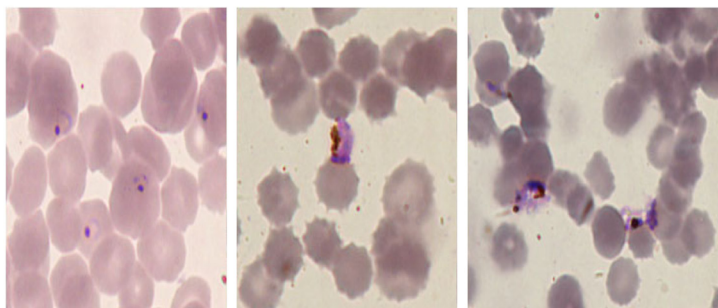

Untreated

$\Delta$  Fd 2.5  $\mu$ M (IC<sub>70</sub>)

**C** Schizont stage Synchronized culture after 6 – 12 h.

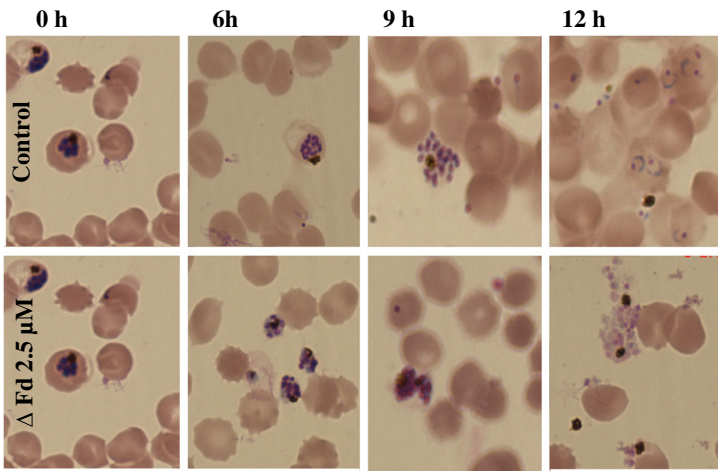

Supplement: MOESM12 [file 9542830]
